# Supplementary material for: A Qualitative Exploration of Multi-level Factors that Support Effective Community Health Worker-Social Worker Collaboration
Source: Research Square preprint supplement (doi:10.21203/rs.3.rs-6733746/v1), 2025-06-13
Supplement: Supplementary file 1 [file 568f4073951c0d987e790232.docx]

| **Table 1: Characteristics of Focus Group Organizations (N=37)** | | | | |
| --- | --- | --- | --- | --- |
| **Organization** | **Type of Organization** | **Region of the United States** | **Population Served** | **Participant Distribution** |
| Organization 1 | Health (hospital, clinic, or health plan) | West – California | Medicaid health plan that serves individuals with chronic physical or medical health conditions | CHW: 6  SW: 3  Total: 9 |
| Organization 2 | Community | South – Texas | Low-income cancer patients, primarily Black and Latinx | CHW: 3  SW: 5  Total: 8 |
| Organization 3 | Community | East – South Carolina | Perinatal individuals and families in rural communities | CHW: 6  SW: 4  Total: 10 |
| Organization 4 | Community | North – New Jersey | Socially and medically complex individuals | CHW: 6  SW: 4  Total: 10 |

| **Table 2: Demographics of CHWs and SWs Completed Qualitative Focus Groups (N= 34)1** | | |
| --- | --- | --- |
|  | **CHWs (n= 18)** | **SWs (n= 16)** |
| **Age (mean, SD)**2 | 45.4 (10.4) | 35.2 (9.9) |
| **Gender (% female)** | 17 (94%) | 10 (63%) |
| **Race/Ethnicity** |  |  |
| Black | 10 (52%) | 6 (37%) |
| White, non-Hispanic | 0 (0%) | 4 (25%) |
| Hispanic/Latinx | 8 (48%) | 3 (19%) |
| Asian | 0 (0%) | 3 (19%) |
| **Language** |  |  |
| English only | 11 (61%) | 13 (81%) |
| English & Spanish | 7 (39%) | 3 (19%) |
| **Education** |  |  |
| High School/GED | 5 (28%) | 0 (0%) |

| Some College | 5 (28%) | 0 (0%) |
| --- | --- | --- |
| College Degree | 7 (39%) | 2 (13%) |
| Graduate Degree | 1 (5%) | 14 (87%) |
| **Years as CHW or SW** |  |  |
| Less than 2 years | 5 (28%) | 2 (13%) |
| 2-5 years | 7 (39%) | 5 (31%) |
| 6-9 years | 2 (11%) | 3 (19%) |
| 10+ years | 4 (22%) | 6 (37%) |

1Qualitative sample demographics does not include 2 CHW participants and 1 SW participant who did not complete the survey

2Based on n=28 as some participants declined to report

| **Table 3: Qualitative themes and subthemes from Community Health Workers and Social Workers (N= 37)** | |
| --- | --- |
| **Theme** | **Illustrative Quote** |
| ***Individual Level Factors*** | |
| **Roles and scopes of practice** | *CHW, Org 3:* “If they’re medically high risk, and they have any heart problems, previous losses, stillborn, we're referring them to our social worker that specializes in maternal mortality. If they score high on the Edinburgh [Depression Screening]...if they’re previous with domestic violence, we're connecting them to a social worker.”  *SW, Org 1*: “There's always been a history of some crossover between CHWs and SWs. In the past, there was a lot more confusion and we would have CHWs that would clearly identify themselves as social workers and we would have to say, ‘Well, you know, not technically but yes, you are helping with the resource piece of things.’ |
| ***Relationship Level Factors*** | |
| **Communication** | *CHW, Org 4*: “If we're not able to come to a conclusion for that person, we table it. We try to bring it back and try something else different…we're learning and we navigate through it together… It makes you feel heard and makes you feel connected with the team. We may not always have the answers, but we [are] always going to come together.”  *CHW, Org 2:* “I had an intake in June… and then right after that I caught COVID. I’m just coming back to work now…I get an actual call from the client, and he said, ‘Nobody has called me.’ I said ‘Oh my gosh. Since June?’ I apologized to him, and I called the SW. It just fell through the cracks, nobody knows what happened.” |
| **Mutual Respect** | *CHW, Org 3:* “And sometimes we may not know something, and they may know something or vice versa. So we kind of collaborate.” |
| **Supportive Supervision** | *SW, Org 4*: “I think we can think about, or discuss openly, various reasons they might have not had access to the same opportunities I've had for higher education, for mentorship. I think there's racial dynamics, there’s equity dynamics, maybe lived experience and stigma around that, that has kept people from some of these experiences.” |
| **Power dynamics** | *CHW, Org 3*: Some time when we say the word social worker…they put guards up thinking negative. So you have to work with them to let them feel comfortable again, trusting…and introducing the worker to them and |

|  | letting them know…she cares about you…and the purpose they are here…sooner or later the guards [they] come down and allow them to enter in, and then when they get in, they love them, and then they don't want to let them out of the house.  CHW, Org 2: “There’s a lot of opportunity to expand with getting more CHWs in to do the role that I myself am doing without having to pay…the same amount as the social workers, because they are licensed they are…very trained. But we can do that, and still serve and meet people and have there be more equity.” |
| --- | --- |
| ***Organizational Level Factors*** | |
| **Commitment to Equity** | *SW, Org 2*: “What we're going to be diving into more as an agency is the social determinants of health. Our community health workers have a pretty solid understanding of the social determinants, and it's an opportunity…to have our social work staff lean into that a little bit more…because our service delivery model is essentially based on social determinants of health. And so that is a great opportunity that I feel will…enhance the level of collaboration by having both parties have an equal understanding of social determinants of health, and how they impact what we do.” |
| **Leadership Buy-in** | *CHW, Org 2*: “We don’t have quotas. They allow us the freedom to put in as much effort to make sure that somebody is taken care of as needed. You can spend eight hours with one person and they won’t blink an eye. They’re wonderful.” |
| **Clear Workflow** | *CHW, Org 3*: “Being a part of [Org 3], you make contact with several of our teams. If you do childbirth, if you do lactation, breastfeeding, and if you do reproductive health…you're going to come in contact with many members of our team. So that's why we're always trying to make sure that trust is built, and we're building up the entire team.”  *CHW, Org 1*: “When we got integrated where we were in a group, where we had a registered nurse, we had a care manager, we had a social worker and a CHW; so we had to figure out what all our roles were going to be and what piece it was going to go to…Right now we're still working with it…and getting that workflow…where the handoffs [are] going to be, and who's going to keep a case and who's going to follow up.” |
| **Standardized Organizational Training** | *SW, Org 2*: “A lot of the way they’re the same is kind of the way we do intakes with clients. We all follow the same intake script. And so they're trained in the same way we are, in terms of reaching out for the clients, completing intakes, getting them enrolled on services and then they make referrals. So when it comes to the actual, sit down at the desk, talk to a client over the phone, sit face-to-face with a client at [Org 2], our roles are almost indistinguishable.” |

| **Shared Documentation** | *SW, Org 4*: “It's sort of like a joint EMR system that different healthcare systems sign onto and it's confidential within the systems. And a lot of the client information is shared for care coordination purposes.”  *SW, Org 1*: “From an organizational aspect, I would love to see systems more streamlined, so that each one of our people aren't having to open up four or five different things just to get through the day…especially when it comes to the double documenting.” |
| --- | --- |
| **Shared physical space** | *SW, Org 4*: I think over the course of the day, I interact a lot with the housing first team and with SW 22 because we're all in the same office. Our office is very open plan. |
| ***Societal Level Factors*** | |
| **Sustainable funding** | *SW, Org 1*: I think all of that stuff that you mentioned is very relevant especially nowadays, when a lot of social injustices are coming into the view of the public and even things like health care and with covid, it's definitely impacted you know our practice…all of that really impacts our work as social workers and CHWs because ultimately that impacts funding, and you know the resources that are available to our client population.  *CHW, Org 2*: We’re hoping…to get more community health workers in. Obviously, social workers, their licensed…they’re a little more expensive right, then the community health workers…And we’re understaffed…everybody has needs but if you have an active client, as opposed to you know the five clients that you need to call and the other five clients that you already, they’re calling you and telling you they need these things. You have to address them because they’re already in the system and that pushes the people who are waiting in line further back. |
